# Supplementary material for: Comparative Neutralization Activity of Commercial Rabies Immunoglobulin against Diverse Lyssaviruses
Source: MDPI journal article supplement (doi:10.3390/vaccines11071255), 2023-07-18
Supplement: s1 [file s1]

>ARAV\_RV3379\_Complete glycoprotein cds\_P#12

ATGCCCTTCAGGCAATTCCTCTCCCTCATTCTCCCGTTTTAGTGGCAGGGAAGTTCCCATATATACT  
ATCCCTGACAAGATCGGTCCTTGGAGTCCCATCGACATCAACCACCTCAGATGCCCAAACAATCTGGTTGTAG  
AAGACGAAGGATGTACAACCTCTACTGCGTTCTTATATGGAGTTGAAAGTGGGGTATATCACCCTATAAA  
AGTGAGTGGGTTTACATGTACTGGGGTCGTTACAGAGGCTGAGACTTACACCAACTTCGTGGGATATGTTACA  
ACCACCTTTTCGGCGCAAGCATTTCAGGCCGACCCGAAGTGCCTGCAGAGAGGCGTACAACCTGGAAGCTACA  
GGTGATCCCAGATACGAGGAGTCTCTGCATAACCCTTACCCGACTCCCACTGGTTAAGAAGTCAAGACCA  
CAAAGGAATCACTCTAATTATATCTCCGAGTGTGGCAGATATGGACGCATATGACAAAGCACTCTACTCTAA  
GATATTCCTCAACGGAAAATGCTTAGGAGTGCCTTGGAGTCCCTTTCTGCTCGACCAATCACGATTACACCC  
TTTGATGCCTGAGAATCCGAAACCAGGTGTATCATGTGACATCTTACCACAAGCAAGGGGAAGAAGGCAA  
CGAAGGACGGCAAGCTGTGCGGGTTCGTCGACGAGAGAGGACTTTATAAATCATTGAAAGGGGCATGTAAA  
CTGAAACTCTGCGGGTTCATGGGATTGAGGCTGATGGATGGGTCCTGGGTGTCTCTCCAAAAGACAGAGGAG  
TCTGAATGGTGTCTCCGAATCAACTGATTAACATTCATGACTTCCACTCAGATGAGATTGAACACATGGTGGT  
GGAGGAGTTAGTTAAGAAAAGGGAGGAATGCTTAGATGCCTTGGAGTCAATCATGACAACAAAGTCCATAAG  
TTTTAGACGCCTCAGCCATCTTCGGAAGTTGGTCCCTGGATTTGGGAAGGCATACACTCTGATCAACAAAACCC  
TCATGGAGGCCGATGCTCACTACAAGTCAGTCAGGGAATGGACAGAGGTGATCCCCTCAAAGGGTGTTTAA  
AAGCCGGGGGAGGATGTTATCCCATTATAACAGGGTGTTTTTCAACGGGATCATCCTGAGTCTGATGGACA  
TGTGCTAATTCCAGAAATGCAATCTGCTTTACTCCAGCAACATATTGAGCTGTTGGAATCTTCTGTCATACCCCT  
CAGACACCCCTTGCGGATCCATCTACTGTTTTCAAAGGGGATGATGAGGCGGAGGAGTTCGTAGAGGTCCA  
TCTTCGGACACGCAAAAGCAGATCTCGGGGATTGACCTAGGCCTCCAGAGTGGaaaagaTACTTTCTAATGG  
GGATGTCTGCCATCGGATTTCTTGCTTTGACGATAATCCTAGCGGTGTGCTGTGCGGAGGATCAAGAGACGAAA  
GCAGTCTAAACCAACCCCGTTGAGCTGATTAATAAAGTTTCTGTACCTCTCAAAGTGGGAGAGCGATTCCA  
TCATGGGAGTCTTACAAGGTCAAGACTGGGGATCAACCTCAAGTCTAG

>ABLV\_RV634\_Complete glycoprotein cds\_P#7

ATGCTCCTCAAATTGTCCTCCTTATGTCCCTGATGGTCTTCTCACCATGCCCTGGGAAATTCCTCTCTACACA  
ATACCCGACAAATTGGGCCCTTGGAGCCCAGATAGATATTCATCATTTGAGCTGTCCAAACAACCTGATTGTTGA  
GGATGAGGGATGTACAAGCCTGTCCGGGTTTTCATATATGGAGCTAAAGGTTGGGTTTATAACCACTATAAAG  
GTTAGCGGGTTTACCTGCACTGGAGTTGTGACTGAATCAGAGACCTACCTAACTTCTTTGGGTATGTCACGA  
CTACTTTTAAGAGGAAACACTTTTCGTCTACCCCGGAGTTTTGTAGGAATGCATACAACCTGGAAAGTTGCAGG  
TGACCCAGGTATGAGGAGTCTTTCACAACCCCTTATCCAGACTATCACTGGTTGAGAACAGTTACAACCACTA  
AGGAGTCTCTTGTATCATATCACCCAGTGTAGTAGACATGGACCCCTATGACAAATCCTTGCATTGCAAAATG  
TTCCCTAAAGGCACATGCTCGGGAGCCTCGGTCCCTTCGATTTTCTGCTCCACTAATCATGATTACACATTGTG  
GATGCCTGAGAATCCTAAACCAGGAATGTCATGTGACATCTTTACAACAAGCAAAGGAAAGAAAGCATCGAA  
GGGAGGAAAGGTGTGCGGTTTTGTTGATGAACGTGGATTGTACAAATCTCTGAAGGGAGCATGCAAACCTAA  
GTTGTGCGGAATCTCTGGTCTCAGGCTTATGGACGGGTCTTGGGTTTCCATCCAAAATCATGAGGAGGCCAAA  
TGGTGCTCTCCTGATCAGTTGGTAAATATTCATGATTTTCATTGAGATGAGATAGAACAACCTTAATTGTAGAGGA  
ACTGGTCAGGAAGAGAGAAGAATGTTTGGATGCACTGGAGTCAATAATGACTACCAATCAGTCAGTTTTAG  
ACGTCTCAGCCACCTAAGGAAGCTTGTGCCAGGATTCGGGAAGGCTTATACCATTGTCAACAAAACACTCATG  
GAGGCTGATGCACACTATAAATCAGTCAGAACATGGAATGAGATCATACCATCTAAAGGGTGTCTAAAGGTT  
AGAGAGAGGTGTCATCCTCCTTATAACGGGGTGTCTTTAACGGGATCATTTTGAGTCCAGACGGACATGTCT  
TAATTCCGGAGATGCAGTCTCCTTGCTACAGCAGCATTGAGCTACTTGAATCATCCGTAATACCTCCTATC  
CATCCTCTGGCAGATCCATCTACTGTCTTTAAAATAGATGATGAAGCAGAAGACTTCATAGAAGTCCACCTTCC  
CGATGTCCAAAAGCAGGTCTCCGGGATCGACTTGGGTCTCTCGGAGTGGGAGAGATATCTGATCATCGGGGC  
TTCTGCTGTAATCTTGTGCTCTGGCAATAATTTTTGCAGTTTGTGCGAAGGTGTAAGAGACGGAAAAAG

GCCAGAACTGATCGTATAGAGTTAGACCGTAAAGTGTGAGTAACATCTCAAAGTGGGAAAGTGATCCCTTCTT  
GGGAATCCTACAAAATTGAAGCCGGAGGTCATTCAGGTCGTGA

>DUVV\_DUVVSA06\_Complete glycoprotein cds\_P#unknown

ATGCCACTCAATGCAGTCATCTTTACTCTTCTCCTCAGATGTTCCATCTGCCTTGGAAAGTTTCCATTTATACG  
ATCCCTGACAAATTGGGGCCATGGAGCCCTATAGACATACATCATCTCCGTTGCCCAAATAACTTGGTTGTGG  
AAGACGAAGGATGTACAACCTTAACCCCTTTTTCATACATGGAGTTAAAGGTAGTTACATTACATCAATAAA  
GGTGTCCGGTTTTACCTGCACTGGGGTAGTGACGGAAGCTGAGACTTATACCAATTTGTTGGGTATGTGACG  
ACAACATTTAGAAGAAGACATTTCCGTCCATCAGTCAACTCTTGTAGAGATGCATACAATTGGAAGATCGCAG  
GAGACCCTAGATATGAAGAATCACTACACAACCCTTATCCAGACTCTCACTGGCTCAGAAGTGTCAAGACTACA  
AAAGAATCTCTTTGATAATCTCCCCAGCGTGGCTGACATGGATGCTTATGACAAGAAGCTTTACTCCAAGAT  
GTTTCTAACGGAAGGTGTTCCGGAATATCTCCTGGGTCTCCCTTCTGTCCACCAATCATGAATACACTATCT  
GGATGCCCCGAGAGCTCAAACCCCGGAATATCCTGTGACATATTCACAAGAAGCATGGGGAAGAAAGCCACCA  
AAGATGGACAGTTATGTGGGTTTGTAGATGAGAGAGGACTGTACAAATCTTTGAAGGGAGCTTGTAGATTAA  
GACTCTGTGGGATCAGTGGACTGAGACTGATGGACGGATCCTGGGTTTCACTCCACAGGTTAACAACCTCAGA  
ATGGTGCTCCCCAGACCAACTCGTCAACATTCACGACTTCCATTGAGATGAGATAGAGCATCTTGTGCGAGATG  
AGTTGGTAAAAAAGAGAGAGGATTGTCTAGACGCCCTTGAAACTATCATCTTCACCAAATCTATAAGTTTCCG  
GCGGTTAAGCCATCTTCGGAAGCTGGTTCCAGGCTTTGGTAAAGCATATACTATCATAAATAGGACCCTTATG  
GAAGCAGAGGCTCATTACAAGTCAGTGCGGGAGTGGAAAGAAATTATCCCATCCAAGGGGTGTCTGAAGGC  
AGGAGGGAGGTGCTATCCTCATCACAATGGAATTTTCTCAACGGGATCATTCTGGGTCCGGGAGGGGAGAT  
CTTGATCCCTGAGATGCAGTCTGCCTTGCTCCAACAGCACATTGAGCTGTTAGAGTCTCTGTAGTTCCCTCA  
ACACCCCTGGCAGACCCTTCGACTGTCTTCAAGAACGATGATGAAGCGGAGAGTTTCGTAGATGTTACCT  
TCCTGATACAAACCAAAAAATATCTGGAATTGACTTAGGGTTGCCAGAGTGGAACGTTACTTCTAATAGGA  
GTCTCAGCAGTTGCTTTGTTGGCTTTATCTATAATTATCGCCGTCTGTTGCAAAAGGTTTCAGGAAAAGGAGGA  
AATCCAAACCCAGTCCAGTAGAATTGACTAGAAAAGTGTGAGTCATATCCAAAGGAAATGGACCGTCCCTTC  
CTGGGAATCTTATAAAGAAGGAACACAGGAGATGTTTCGTAATATGACTCCATCAACAAGGGAGTGA

>EBLV-1\_RV20\_Complete glycoprotein cds\_P#11

ATGTTACTCTCTACCGCCATATTGCGCTTTTTCTTGAAGTGTGCTCCTTGTCTGGCAAAGTTCCTAATCTACACCA  
TCCCGGATAAGATTGGACCGTGGAGTCTATTGACATAAACCATCTCAGCTGCCGAACAACCTTGATCGTGGA  
AGACGAGGGATGCACGACTCTCACCCCGTTCTCGTACATGGAAGTAAAGTGGGATATATAACAACAATAAA  
AATAGAAGGATTTACATGCACTGGTGAATAACAGAGGCAGAGACCTACACAACTTTGTAGGGTATGTGAC  
TACAACCTTCAAGAGGAAACATTTCCGGCCAAGTGTGAGCGCTGTAGAGATGCCTACAACCTGGAAGATTACC  
GGTGATCCGAGATATGAAGAGTCACTGCACAATCCTTACCCTGACTCTCATTGGTTGAGAAGTGTGAAGACCA  
CCAAGGAGTCTCTTCTGATCATCTCTCCTAGTGTAGTGCACATGGACGCATATGACAAAAACCTACTCCAAA  
ATGTTCCCTAATGGTAAATGTCTAGCTTCAACCCCGAGTGCCATATGTTGTCCGACAAATCATGATTACACCATT  
TGGATTCCAGAGAATCCTAAACCCGGGCTGTCTGTGATATATTCACAACTAGCAAAGGAAAGAAAGCAACCA  
AAGACGGGAGGCTGTGTGGATTTGTGGATGAGAGAGGATTGTACAAATCCTTGAAGGGGGCTTGCAAGCAG  
AGACTCTGTGGGGTCCCTGGCATGAGATTGATGGATGGATCATGGGTATCTCTTCAGAAAAGTGAAGCTCCG  
GAATGGTGCTCTCCAGATCAGCTTGTTAATGTCCATGATTTCCATACAGATGAAATTGAACACCTTGTGGTTGA  
AGAGTTGGTGAAGAAGAGGGAAGAGTGTGGATGCTTTAGAACTATCATCACAACCAAGTCTATAAGTTTC  
AGACGTCTCAGTCATTTAGGAAACTGGTTCTGGGTTCCGAAAGGCATACACTCTCATCAACAAGACTCTCAT  
GGAAGCAGATGCCATTACAAGTCTGTAAGAGAATGGAAAGAAGTATCCCATCTAAAGGGTGTCTGATGGC  
AGGGGGGAGGTGCCATCCTCACTACAGTGGTATATTCTCAATGGGATCATACTGAGTCCAGGGGGTGTGT

ACTCATTCCGGAGATGCAGTCAGCCTTGTTACAGCAGCACATTGAGCTGCTAGAATCCTCGATGATTCCTCTCA  
GACATCCCTTGGCTGACCCTTCCACGGTGTCAAGAGAGATGATGAGGCAGAGGATTTTGTGAGTTACCT  
TCCAGACACCCAAAACTCATATCAGGCATAGATCTGGGTTTTCCGAATGGAAGCGTTACTTTCTTATAGGAA  
TATCTGTGCTAGCCCTTCTGCCTTAGCAATAATTACTGCAGCATGTTGCAAAAGGTTCAAGAGGAGAAGGAG  
GCCTAAGCCAAACCAATAGAGTTGATCAGGAAAGTTTCTGTAACCTCTCAAAGTGAAGGGCAATCCATCT  
TGGGAGTCGTACAAAGTGGGGGCCACTGGTGAGTCGTAA

>EBLV-2\_RV628\_Complete glycoprotein cds\_P#8

ATGCCATTTCAAGCTGTCCTGTCTGCTCTTCTTTCGGCCCTCACACTCTGCGTCGGCAAGTTTCCCATCTACACA  
ATCCCTGATAAGTTAGGCCCGTGGAGCCCCATTGACATTCATCATCTTAGCTGCCCGAACAATATTGTCGTAGA  
GGATGAGGGATGTACGACCCTAACAGTATTCTCATACATGGAGTTGAAAGTAGGATATATAACAACCATAAAA  
GTGAACGGATTTACATGTACTGGGGTGGTGACAGAGGCAGAGACTTATACTAACTTTGTTGGTTATGTAAC  
CCACGTTCAAGAGGAAGCATTTCCTGCCAGCCCTAGTGCATGCAGAGATGCATACAGTTGGAAGACTGCAG  
GTGATCCGAGATATGAGGAATCCTTACACAATCCCTATCCAGACTCTCACTGGCTAAGGACAGTTACCACCACC  
AAAGAGTCCGTCCTGATAATCTCCCCAGTGTGGCCGATATGGATGCGTATGACAAAATCTTTATTCTAAAAT  
ATTTTTAAATGGGAAATGCTCAGGAGTCTCTCAAGTCTCTCCCTTCTGCTCAACCAATCATGATTACACGATCTG  
GATGCCCGAGAATCCCAACCCGGGTGTGTCTTTCGACATATTCACGACCAGTAAGGGGAAGAAAGCTACAAA  
AGATGGCAAATGTGCGGATTTGTGCGATGAAAGAGGACTTTACAAATCATTAAAGGGGGCTTGAAACTGAA  
ACTGTGTGGAATCTCTGGTATGAGGTTGATGGATGGGTGTCATGGGTGCTATTCAAATCACGATGAGGCAAA  
ATGGTGCTCCCCGATCAACTTGTGAACATCCATGACTTTCATTGAGATGAGGTAGAACACCTCATTGCGGAG  
GAGCTTGTTAAAAAGAGAGAGGAGTGTGTTAGATGCGTTAGAGTCAATCATGACTACCAAGTCAATAAGTTTT  
GCCGTCTTAGTCATTTAAGAAAGCTAGTCCCTGGGTTTGGGAAAGCTTACACCATTATCAACAAAACACTCATG  
GAAGCTGATGCTCATTACAAGTCTATTAGAGAATGGACCGATGTGATCCCCCTCAAGGGGTGTCTGATGGCAG  
GAGGCCGATGTTATCCTCATCACAAATGGAGTCTTCTTAAACGGTATAATATTGAGTCCAGATGGGCACGTGTTA  
ATCCAGAGATGCAGTCTGCAATGCTTCAACAGCATATAGAGTTGTTAGAGTCATCGGTGATACCTCTCATGC  
ACCCCTTGCTGACCCATCCACTATCTTTAAGAAGGATGACGGTGCTGAGGATTTTGTGAAAGTCCACCTTCT  
GACGTGCAAAAGCAGATCTCGGGGATTGACCTAGGTCTTCCCGAGTGAAGAGGTATTTCTGATCGGGGTG  
TCGGCTTTGGCTTCTTGCCTTGATGATTTTATTGCCGCTGCTGTAGGAGAGTTAAACGTAAGAAGAGAG  
CCAAACCAACCCAGTGAACATAATCCGAAAAGTGTCTGTCACTTCCCAAAGTGGGAGACCGATTCTTCATG  
GGAGTCTTACAAGGTAGAGACGGGGGGTCAAGTCTTAA

>IKOV\_RV2508\_Complete glycoprotein cds\_P#8

ATGGCTCAGTTGGTCACTTTGGTGCTGAACGGATTGTCCCTTTTGACAGGGCCAGGCATATTTCCAATGTATAC  
AATCCCTGAAGGGCTGGGTCCCTGGACTCCGATTGATTTATCTCATCTGAAGTGTCTGACAATACATACTTTG  
CAGAAGAGGGCTGCAATGAGGGCAGCAAGGTGTCTACTTAGAACTGAAGCCTTCTTTTATTCTCAAAACAA  
AGTACAGGGATTTACCTGTACAGGGATAATCAACATGGCAACCACATACACCAATTTGTTGGTTATGTCACC  
ACCACTTTTCAGCGGTCCCACTTCATCCCCAACAGAGGGATTGTCGTCAAGCTAGAGAGTGAAGAAGGAA  
GGGGACCCAAGATACGAAGAGTCATTGACCACTCCTTATCCCGACTCTAAATGGTTGAGAACAGTCAACACCT  
CCAAGGAATCATGGCTGATATTGGATCCTGCAGTGGTTGAGATGGACATCTACAACAAGACAATGTTTTCTCC  
AGTCTTTCGGAATGGATACTGCAACTTTTCTCCAGAAAATCCAGATTTTTGTGAGACAAATCATCAACTCCA  
TTTGGATTCCGGAAGATGAGGGACGAGGAATTACATGTGACATCTTCCAAGCGAGTACTGGTATATTACTGAA  
AAATGGAAGCAAAGTCTGCGGTTTCCAAGATGAAAGAGGATTATTCAGAAGCATAAAGGGTGCATGCAAAAT  
GATAATCTGTGGAAAGTCTGGGGTCCGACTATATGATGGGACATGGGTGTCTTACAATTCTGTTGATAACCTC  
AGGATGTGTTCCAGATCAAAAATGGTGAACAAACACACAGTTAAATTGGATAATATAGAAGAGTCCATTGTGA

GAGATCTTATTAAGAAGCGTGAAGAGTGCCTAGATGCTCTAGAAGAAGTCATGTTGACTAGATCTATAAGCTT  
CAGAAAGTTGAGTCTCTTTAGAAAGCAAGTTCCAGGAAGAGGGTATGTTTACACTATGATAAACAATACAATG  
ATGGAGGCAACAGGGCATTATAAATCAGTGGATAACTGGACAGACATTCTACCTAACCCAATCTGCCTTATGG  
TGGACGGCAAGTGTCCAGGTTATGATGGTGTATTATTTAACGGTATCATAAGAGACAGTAGAGGCAAAA  
TACTAATTCCAGAAATGCAATCACATCTACTCCGAGACCATCTGGAGTTGCTCAAGAGAAAATTCCATTCCCTGG  
AGACACCCTCTTGTGCACTATTCTGAAAATGGGGAAGATGGCTCAGATCTTACCAGCTTTGCTCAGCTATACAT  
AAAAGACCCTCATTGTCTGTTTCTGACATAGATATAGGATTCCTTCATGGAAGAAGTATTTGATGATTGTGG  
GGGGAGTGTGATAGGACTAATTGTCTTCTGGTCTTGGTCAAGTTGTTGTTTAGAGTATGTTATACTGTAAAG  
AGGAAAAGGCTTCGTGAGGGTCTATGAATGAGACATCCAGTGGCCCTGTCATTCGGACTTCTGGTGACAAA  
AGCTTCGTGGGAATCTTACAAGAGTTCTGCATTCTAG

>IRKV\_RV3382\_Complete glycoprotein cds\_P#5

ATGTCGCTCCTCACTGCCGTTATTGCCTTCTCTTCATTAGCACCTTCTGTTCCAGGAAAATTTCCCATTTACACGA  
TCCCCGACAAGATTGGGCCTTGGAGCCCCATTGATATAAATCATCTCAGCTGTCCGAACAACTTAGAGGTAGA  
GGATGAGGGGTGTACTACTCTCACCGCATTCAACTACATGGAACCTCAAGGTAGGATACATAACATCTATTTAA  
GTCGACGGATTCACTTGTACAGGGGTGGTTACGGAGGCAGAGACTTACACGAACTTTGTGGGGTATGTGACC  
ACAACATTTAAAAGGAAGCACTTTCGCCCTAATGTCAGCGCCTGCAGGGCAGCCTTTAGTTGGAAGACAGCAG  
GCGATCCGAGGTATGAGGAGTCATTGCACAATCCCTATCCTGATTCCCATTGGTTGAGGACAGTAACCACCAC  
AAAAGAATCTTTGTTGATTATCTCTCCTAGTGTTGTCGACATGGACGCCTATGACAAGACACTCTACTCCAAGA  
TGTTCCCCAACGGGAAATGCTTCCACCAATATCAGATTCTCCATTCTGCTCGACCAATCATGATTATACATTAT  
GGCTTCCCGAAAAGAGAAGCTTAGCATGTCCTGCAATATATTTGCTCCAGTAAGGGGAAGAAAGCAACAA  
AGGACGGTAGATTGTGCGGATTTGTCGATGAAAGAGGACTGTACAAGTCTCTCAAAGGGGCATGTAAATTGA  
AGTTATGTGGGATGGCAGGCATGAGGCTGATGGACGGGTCTTGGGTGTCCCTACAAAGGGCAGATGCCCTG  
AGTGGTGTCCCCCGGTGCTCTTGTAAATGTGCACGATTTTCATTCCAGACGAGATAGCCCACTTTGTTGTTGAG  
GAGCTAATAAAGAAACGAGAAGAATGCTTGGACACCTTAGAGACCATCCTCACCCTAAGTCTATAAGCTTTA  
GGCGTCTGAGCCATTTAGAAAAGCTGGTGCCTGGTCTAGGGAAGGCATATACTCTAATAAACAACACCTTGAT  
GGAAGCTGAAGCTCACTATAAGTCTATTAGGGAATGGAAAGAAATTATTCCATCTAAAGGTTGTTTGAAGGCG  
GGGGGGCGTTGTCATCCTCACTATGATGGGATCTTTTTCAATGGGATAATTCTCGGTCCGAACGGAGATGTGC  
TCATCCCAGAGATGCAATCGTCCCTGCTTCAGCAACACATAGAGTTGTTGGAGTCATCTATGATTCTCTTAGA  
CACCTCTGGCTGATTCTTCTGCTATATTAGGAGTGATAATGAGGCTGAGGACTTTGTAGATGTTTCATCTTCC  
TGATACACAAAACAAGTGTGAGATATAGATTTGGGCTTTCGGGAATGGAAGCGCTATTTCTTGATAGGGGTC  
TCTGCAATTGCCTTGTCTCTAGCAATAATAATAGCTGTTTGTGTAAGAAAGTTCAAGAGAAGGAAGAGGC  
CCAAACCAGGCCCAATTGAGTTGGTGAGGAAAGTTCCGTTACTTCCCAAAGTGGAAGGTGGTCCCGTCTTG  
GGAGTCTACAAAGAGGGTGCCACAAGTCAACCTAA

>KHUV\_RV3380\_complete glycoprotein cds\_P#8

ATGCCCTCTCAAGCAGTCTTTCTTGTCTTACCACGGTTTTCTCTCAGTGTGTTGGGAAATTCCTATTTACACTA  
TTCCTGACAAATTAGGACCTTGGAGCCCCATAGACATTCATCATCTTAGCTGTCCGAATAATTTAGTGGTGGAA  
GATGATGGGTGCACCACCCTATCTGGGTTACCGTATATGGAGTTGAAGGTGGGATATATAACAACGATAAAA  
GTAGATGGTTTTACATGTAAGTGAAGTAGTACAGAGGCAGAAACCTACACAAATTTTGTGGTTACGTTACCA  
CCACTTTCAAAGGAAACATTTAGGCCAGGCCAAGTGCATGCAGGGATGCATACAACCTGGAAAGCCGAG  
GTGACCCTAGATACGAAGAGTCCTTGCACAATCCATATCCAGATTCTCACTGGTTGAGAACCGTCACAACCACT  
AAAGAGTCTCTTTAATCATTTCGCTAGCGTGGTGGACATGGATGCATACGACAAATCTTCTCTCTAAGAT  
ATTCCCTAACGGGAAGTGCCCCGGGGTATCCATTGCCTCTCCATTTTGTCCACCAATCATGATTACACAATTTG

GATGCCTGAAAACACAAAGACCGGAATGTCGTGTGATATATTCACGACCAGTAAAGGGAAGAGAGCTACTAA  
GGATGGTAAGTTGTGTGGGTTTGTGATGAGAGGGGGCTCTATAAATCATTGAAGGGATCATGCAAATTGAA  
ACTGTGCGGTGTCTCTGGCTTAAGGCTGATGGACGGGTCATGGGTCTCCATCCAAAATCACGAAGAGGCCAA  
GTGGTGCCCTCCCGATCAACTGGTGAACGTTTCATGATTTCCACTCAGATGAGATCGAGCATCTGATTGTAGAG  
GAGCTTGTTAAGAAGCGGGAGGAGTGTGGACGCCTTAGAATCGATCATGACAACCAAATCGATCAGTTTTT  
GTCGCCTCAGCCACCTGAGAAAATTGTTCTGGGTTTGGCAAAGCTTACACCATCATAACAAGACTCAT  
GGAAGCTGATGCTCATTACAAGTCGATAAGGGAATGGTCAGAAATTATCCATCCAAGGGATGTTTGGTAGC  
GGGAGGCAGATGTTATCATCATCACAATGGAGTATTCTTCAACGGGATAATCTTGAGCCCTGATGGACATGTA  
TTAATCCCGGAGATGCAGTCTGCTTGTCTCAACAACATATCGAGCTATTGGAGTCATCTGTAATACCACTCAT  
GCaTCCACTGGcTGACCCTTCCACTGTTTTCAAAGGGGATGATGGGGcGGAGGATTTTgTAGAGTTCATCTTC  
CaGATGTTCAAAAACAGATCTCTGGAATTGATTTAGGCCTTCCGGAGTGGAAAGAGATACTTCTTAATAGGAGT  
GGCTGCATTGACCCTATTTGCCTTGACAATATTTGTTGTGGTGTGCTGTGCAAGAGTTAGGAGGAGGGAGAG  
GGCCAAACCAATCCAGTGGAAATtGATTCGAAAGGTGTCTGTGACTTCTCAAAGCGGCAAAGTGATCCCTTCA  
TGGAATCATACAAGGTGGAGGCAGAGGGTCAATCCCAAGCCTAA

>LBV A\_LBVAFR1999\_Complete glycoprotein cds\_P#unknown

ATGAGTCAATTGTTCTCAACCTTCATCTTTGCTTGTTCATAGGAAGTTCATAGGAGACTTCCCTCTATATACA  
ATTCCCGAACGGCTTAATCCCTGGACTCCAATTGACTTAATCCACCTGAGCTGTCCTAACAACTTACTGTCTGAT  
GCTGAGGGGTGCAGTGAAACTTCATCCTTTACCTATGTAGAGCTCAAACCGGTTTTCTTGCCCATCAGAAAGT  
GCCGGGGTTCACTTGACAGGTGTGATAAACGAGGCAGTCACATACACCAACTTTGTTGGATATGTTACTACC  
ACATTTAAGAGAAAACATTTTAAACCAACTGTTTCTGCATGTAGGGATGCCTTCAACTGGAAAGTTTCTGGAG  
ATCCTAGATACGAGGAGTCTTTACATACACCCTATCCGGATAACAGTTGGCTGCGAACTGTCACCACAACCAA  
AGAATCCTTGTTAATAATCTCTCCAAGCATTGAAGAGATGGATGTATACGGTAGAACTCTCCATTCCCCATGT  
TTCCTACAGGAATCTGCTCTAAGTTTTATCCATCAATCCCTCATGTGCTACCAATCATGATTACACGTTGTGGT  
TGCCTGAAGACCCTAACTTGAGTTTGATTTGTGACATATTTGTGACAAGCACAGGAAGGAAGGCAATGAATG  
GGTCTCGTATGTGTGGATTCACAGATGAACGAGGGTTTTATCTAACCTGAAGGGAGCATGCAAGTTGACCTT  
GTGTGGGAAACCAGGCCTACTGTTATATGATGGAACATGGGTCTCGTTCACTAGGCCTGAAATCCATGTATGG  
TGCTCTCTGATCAGCTGGTGAACGTGCATAACAACCGCATAGACGAAATTGAACATTTGATTGTAGATGACC  
TCATCAGGAAGAGAGAGGAGTGTGGATACACTAGACACTGTTCTTATGTCTAAGTCGTTAAGTTTCAGAAG  
GCTCAGTCACTTCCGGAAGTTAGTCCCTGGGTATGGAAAGGCCTATACAATCCTCAATGGGAGTCTGATGGAA  
ACCAATGTTCACTATAAAAAGGGTGGATAATTGGGTCGACATACTGCCTTCCAAAGGGTGCCTTAAGGGAAACA  
ATAAATGTATGGAGTCATGCACACGGGTTTTCTTCAATGGAATCATGAAAGGGGCCGATGGTAGGATTTCAT  
CCCTGAAATGCAGTTTGGACTGGTAAAACCACATAAGGGCCTTGAAGGCTGCAGTGTCCCTCTAAGACAC  
CCATTGATTGACAAAGCCTCAGTGTCAAAGGATGGTGTGATGCAGACGACTTCGTCGATGTCCACATGCCAG  
ACATCCAGAAGCTAGTATCTGATGTAGACTTGGGCTTGCCAAATTGGAGTTTCTTTGCTTTGATAGGTGCCAGT  
GTAATTGCACTGCTCATTCTAGTATGTCTTCTGAGGATGTGCTGCAAACGGATGAGGAGAAGAAGCTCTGTCA  
GGGATCAAGTAGCCCCACCGTTTGTCTTACTCCTTCTTCTAAGTCAAAGGTGGTGTCTATCATGGGAG  
TCATATAAAGAGACATCAAGTGTCTAA

>LBV C\_UP6414\_compete glycoprotein CDS\_P#17

ATGAGTCAGCTAATTCTGATACCATTTTTGTGTGTGGTTATAGTGACATCAGTGGGAGATTTTCTTTATATACT  
ATCCCGGAAAAGATAGGCACCTGGACTCCAATCGATCTGATTCATCTAACTTGCCTAACAACTGCTGTGACAGG  
GGATGATGGGTGCAGTGATACTGCCACTTTTAGTTATATAGAGCTTAAAACAGGTTACCTCACTCATCAAAA  
GTTTCTGGCTTTACATGCACAGGTGTAGTTAATGAGGCTGTCACTTACACCAACTTTGTAGGATATGTGACCAC

CACCTTCAAAGGAAGCATTTCAAACCCACAGCCTTAGCGTGTAGAGACGCCTTTCATTGGAAAATCTCTGGA  
GACCCGAGATATGAGGAGTCTTTGCACACACCATAACCTGACAATAGCTGGTTAAGAACAGTTACTACAACGA  
AGGAGTCCTTGCTAATAATCTCCCCAGTATAGTTGAGATGGACGTTTATAGCAGAACCCTTCACTCTCCTATG  
TTTCTGGTGGGGTATGCTCTAAATTCTATCCATCATCCCCTTCTGCTACTAATCATGATTACACCCTATGG  
CTTCTGAGGATGCCAATCTAAGTATGGCCTGTGATATATTTGTTACCAGTACAGGGAAAAAGTCAATGAATG  
GTTCAAGAATGTGTGGATTCACTGATGAAAGAGGATTCTACAGGACACTAAAAGGGGCATGTAAGCTGACTT  
TGTGCGGGAAGCCGGATTGAGGTTATATGATGGAACATGGGTATCTTTCACACGCCAGAGATTAACGTAT  
GGTGTCTCCCAACCACTAGTCAATGTTCAACAATCGATTGGATGAGATAGAACATCTAATTGTGGGAGA  
CCTCATTCCGAAGAGAGAAGAGTGTCTGGACACTCTAGAGACCATTCTGATGTCCAATCTATAAGCTTTAGG  
CGACTCAGTCATTTAGAAAAGTTGGTGCCTGGGTATGGGAAAGCTTATAACAATTATAACGGGAGTCTGATGG  
AAACCAATGTTCACTACCTTAGGGTTGACAGTTGGAATGATATATTGCCTTCAAAGGATGCTTGAAAATGAA  
CAAACAATGTGTGATTCTTCAAAGGAGTCTTCTCAATGGGATTATCAAAGGACTGGATGGACATATTTTG  
ATTCCAGAGATGCAGTCCAGTCTACTGAAACAGCATATGGATCTCTAAAGGCAGCAGTTTTCTCTACGACA  
CCCCTTAATAGACCAAAAATTCTTTGTTAAGAAGGATGGTGTGATGCAGATGATTTTGTGGAAGTTCACATGCCA  
GATATACAAAAGTTKATCTCTGATGTAGACCTCGGATTGCCAAGTTGGAGTCTCTACGCTCTGATAGGAGCTG  
CTGTAATAGCTTCTGATCCTGATATGCTTAATCCACATTTGCTGCAAGAAGAGGGGTCGCACGCGCCCCTCG  
ATAGAAAGACCAGATCTCCCCTAAGCTTGTCCACTACTCCCAGTCTCGGGCTAAAGTAGTGTCTGTTGGGA  
GTCCTACAAGGGAACCTCAAATGTGTAG

>LBV D\_KE576\_Complete glycoprotein cds\_P#4

ATGAGTTACTCGATTTCAACACCTTTTCTGTTGCTGTGGCTGCAATTTCAAGTTGCAGACTTCCCCCTTACACA  
ATTCCCGAGAAGATCGACTCCTGGACGCCTATAGATATGATCCATCTGAGTTGTCCAAATAACCTTTTGTGAGG  
GGATGACGGGTGCAGCACATCCACATCCTTCAAGTACGTGGAGCTCAAACAGGTTATCTGACTCATCAGAAA  
GTGTCTGGGTTACCTGTACCGGGGTCATCAGTGAGGCTGTTACATACACAACTTTGTAGGTTATGTGACAA  
CCACATTTAAAGGAAGCATTTCAGCCACGGTCTCAGCCTGTAGAGATGCATTTCAATGGAAGATCTCAGG  
GGATCCTAGATATGAAGAGTCTCTGCATACGCCTTACCCTGACAGTAGTTGGTTAAGAACGGTCAACACAACA  
AAGGAATCCTTGCTGATAATCTCCCCAGCATTGTAGAGATGGATATATATAGTAGAACTTCTCACTCTCCTAT  
GTTTCCACAGGAACCTGTTCCAGATTTTATCCATCAGTTCATCCTGCGCTACCAATCACGATTACACCTTGTG  
GTTGCCAGAAGATTCTAACTTAAGTCTCATTTGTGACATATTCGTTACTAGCACAGGTAGAAAAGCAATGAAC  
GGCTCCAAGATGTGTGGGTTACAGATGAGAGGGGTTTTTACAGAACACTGAGAGGGGCTGTAAATTGACG  
CTCTGCGGAAACCAGGTCTAAGACTATATGATGGAACATGGGTATCCTTACACGACCGGAAGTTCATGTAT  
GGTGCTCCCGAATCAACTAGTCAATGTGCATAATAACCGTATCGATGAGCTTGAGCATCTGATTGTGGATGA  
CCTTATCCAAAAAGAGAAGCATGTTTAGATACCCTGGAAACAATTCTGATGTCTAAGTCAATTAGTTTCAGGA  
GACTCAGTCATTTAGAAAAGTTGGTACCTGGATATGGAAAGGCTTACACCATATTAACGGGAGCTTGATGGA  
GACAAATGTCCACTACAGAAGGGTGGACAATTGGACTGATATCTTACCATCGAAAGGATGTCTGAAAGTGGG  
GAACAAATGCCTTGATCCCCATAAAGGAGTTTATTTCAATGGTATTATTAAGGGTCCGGATGGTCATATTTTAA  
TCCCAGAGATGCAGTCGGGCATGCTGAAACAGCATATAGATCTTCTGAAGGCAGCGGTTTTTCCCCTCCGTCA  
CCCTCTTATAGATCAGAGTTCTGTGTTCAAAAAGATGGTGTGATGCAGATGATTTTGTGATGTTACATGCCGG  
ATGTAAACAAGTTAGTATCGGACATAGATCTAGGGTCCATCACTGGGGTCTGTTTATTCTGATAGGGGTGAC  
AGTATTGGCGTTTCTGTTCTGATATGTCTTTTGTATTTGTTGTAAGAGAGTGAAGAGGGGAAGGTCTACTG  
GGGATAGGACGGACCCGTCATTAGCATTATCTTCAATCTCTCAATCAAACCGAAAGTGGTGTCTGTTGGGA  
GTCTTACAAGGGCTCCTCAAATGCCTAA

>MOKV\_14/024\_Complete glycoprotein cds\_P#12

ATGAATGTACCCTGCCTTGCTATAATCCTTGGCTTCACAACACTACATATTCTCTTGGGGAATTTCCCTTGTACACA  
ATTCCCCGAGAAGATAGAGAAATGGACCCCAATCGATATGATCCATCTAAGCTGCCCAACAACCTTGTTATCCG  
AGGAGGAAGGTTGCAATACAGAGTCGCCCTCACCTACTTCGAGCTCAAGAGTGGTACTTAGCTCACCAGAA  
AGTTCCGGGGTTACCTGTACAGGGGTAGTGAATGAGGCGGAGACATACACAAATTTGTCCGGGTATGTCAC  
CACAACCTTCAAAGAAAACACTTTAGGCCTACAGTCTCCGCTGTCTGTATGCTTACAACCTGGAAAAGTGTCC  
GGGGACCCCAAGTATGAGGAGTCACTGCACACTCCTTACCCTGACAGCAGCTGGTTGAGGACTGTAACCACC  
ACCAAAGAATCCCTTCTTATAATATCGCCTAGCATCGTGGAGATGGATGTATATGGTAGGACTCTCCATCCCC  
CATGTTCCCTCAGGAATATGTTCTAAGCTCTATCCCTCTGTACCATCCTGTAAAACCAACCATGATTACACATT  
ATGGCTGCCAGAAGATCCTAGTTTGAGCTTAATCTGTGATATCTTCACTTCTGGCAGCGGAAGGATGGCCATG  
AATGGGTCCCGCATCTGCGGATTCAAGGATGAAAGGGGATTTTACAGATCTTTGAAAGGCGCTTGAAGCTG  
ACATTGTGCGGAAGCCTGGGATCAGATTATTTGACGGAACCTGGGTCTCTTTTACAAGGCCAGAAGTTCACG  
TGTGGTGCACCCCTAACCAATTGGTCAATATACACAATGATAGAATAGATGAGATCGAGCACCTGATTGTTGA  
AGACATTGTCAAAGAAGAGAGGAGTGTGTTAGACTCTAGAGACAGTATTCATGTCTCAATCAATTAGTTTT  
AGGAGGTTGAGCCACTTTCCGAAATTGGTTCCGGGGTATGGGAAAGCTTACACCATTTTGAATGGTAGCCTG  
ATGGAAGCAAATGTCTACTATAAAAGAGTTGACAGGTGGGCGGACATTTTACCCTTAAGGGATGTCTGAAA  
GTCGGGCAACAATGTATGGACCCTGTCAACGGAGTCTCTTCAATGGGATTATCAAAGGTCCGGATGGCCAG  
ATCCTGATCCCTGAAATGCAGTCAGAGCAGCTCAAGCAGCATATGGACTTATTAAGGCAGCAGTGTCCCTC  
TCAGACATCCTTTAATCAGCCAAAACGCCGTCTTTAAGAAAGACGGAGAGGCAGATGATTTTGTGGACCTCCA  
TATGCCAGATGTGCACAAATCTGTATCAGATGTCGACTTGGGTTTGCCTCACTGGGGGTTCTGGCTGTTGATC  
GGGGCAACTGTAGTGGCATTGTTTGGTCTTGGTGTGTCTGCTCCGTGTTTGTGTAAGAGAGTGAGGAGGGGA  
GGTTCACGACGTACAACCTCAGGAGATCCCCCTCAGCGTTTCTCTGTCTCCGTCCCTCGGGCTACAGTGGTGT  
ATCATGGGAGTCTTATAAAGGGCTCCAGGCACCTGA

>MBLV\_UP5619\_Complete glycoprotein cds\_P#15

ATGGCTTCTATTTTGCATTGATCCTGAACGGAATCTCTGTGGTTTTTCAGTCAGGGACTTTTCCCCCTTACACC  
ATTCTGATCATCTGGGGCCATGGACCCCGATAGATCTGAGTCATCTTCATTGTCCTGACAATCTTTATTCTGAT  
GCTTCCGACTGCACCTCTGAACAAAGCATCACTTATACAGAGTTGAAGGTCGGATCATCAGTTTCACAAAAAA  
TTCCCGCTTACCTGTACAGGAGTAAGGACGGAAGCTATCACCTACACTAATTTGTCGGATATGTGACCAC  
AACCTTCAAGAAAAACATTTCTCTCCGAAACCCCGAGATTGCCGAGAAGCATATGAAAGGAAGAAGTCGGG  
AGACCTCGATACGAGGAGTCCTTAAATCATCCGTATCCAGACAACAGCTGGCTTCAACAGTGACAACGACG  
AAAGACTCTTGGGTGATAATTGAACCTAGCGTGGTTGAGCTAGACATTTACACAAGTGCCTTGTACTCACCTT  
TTTTCAGAGATGGAATATGCTCTAAGGCTAGAACTTATTCTCCCCATTGTACTACTAATCATGACTTCACTTTGTG  
GATGCCTGAGGAGGAGAATATACGATCTGCTTGTAACTGTTCTCTACCAGTCGAGGAAAGTTAGTTGAAAT  
AGAACATCTACTTGTGGAATAATCGATGAAAGGGGGCTGTTTAGGTCTGTCAAGGGGGCTTGCAAAATATCC  
ATCTGTGGTAGACAAGGAATCCGGTTGATTGATGGAACATGGATGTCTTTCAGATATTCTGAATACCTGCCTG  
CTTGTGCGGTATCGCAGTTAGTTAATACTCACGACATTAAGTTGACGAGTTGAAAAGTGCCAATTGTTATGA  
CCTCATTAGAAAAAGAGAAGAATGTCTTGATACTCTCGAGACTATCTTAATGTCTGGATCAGTCAGTCACAGA  
AGGCTTAGCCATTTAGAAAAGCTGGTTCCAGGGTCTGGTAAAGCCTACTCTTATATAAACGGAACCTTAATGG  
AATCTGACGCTCATTACATTAAGTTGAAAAGCTGGTCAAGACATCATTCCATATAAGGGGTGCCTCAGGGTAGG  
AGGGAAGTGTATGAACCGTTAACGGTGTGATTTCAACGGAATTATCAGAGATTCCAACAATCAAGTACTG  
ATCCAGAGATGCAATCAAGTCTCCTCAGAGAGCATGTCGACTTGTAAAAGCAAATATTGTTCCGTTCCAGGC  
ATCCAATGTTGATCAAATCTTTACCTCAGACAATGATGAGGAGATTGCCGAGTTTGTAAACCCCATCTTCAG  
GACTCAGAAGTTGGTGTCTGACATGGATCTCGGATTGTCCAACCTGGAAAAGATATCTTAAATAGGATCCT  
TAGCAGTGGCAGGGATCATTGTCTTTTTGTTTCTTGGGACTTGTGTTTGTGAGATGCCGGTCAAGAGGAAGACG

TGGTATGAATCATTCAAAGCAAAGTCCCCATCTCTGGATGTTATATTCCACAAGGATAAAGACAAAGTGATC  
ACATCTTGGGAATCCTACAAGGGAAGCAATGTTCACTGA

>RABV\_CVS-11\_Complete glycoprotein cds\_P#unknown

ATGGTTCCTCAGGTTCTTTTGTGGTACCCCTTCTGGGTTTTTCGTTGTGTTTCGGGAAGTTCCCATTACACG  
ATACCAGACGAACTTGGTCCCTGGAGCCCTATTGACATACACCATCTCAGCTGTCCAAATAACCTGGTTGTGGA  
GGATGAAGGATGTACCAACCTGTCCGAGTTCTCCTACATGGAAGTCAAAGTGGGATACATCTCAGCCATCAAA  
GTGAACGGGTTCACTTGCACAGGTGTTGTGACAGAGGCAGAGACCTACACCAACTTTGTTGGTTATGTCACAA  
CCACATTCAAGAGAAAGCATTTCGCCCCACCCAGACGCATGTAGAGCCGCGTATAACTGGAAGATGGCCG  
GTGACCCAGATATGAAGAGTCCCTACACAATCCATACCCCGACTACCACTGGCTTCGAACTGTAAGAACCAC  
CAAAGAGTCCCTCATTATCATATCCCCAAGTGTGACAGATTTGGACCCATATGACAAATCCCTTCACTCAAGGG  
TCTTCCCTGGCGAAAGTGCTCAGGAATAACGGTGTCTCTACCTACTGCTCAACTAACCATGATTACACCATT  
TGGATGCCCGAGGATCCGAGACCAAGGACACCTTGTAAACATTTTTACCAATAGCAGAGGGAAGAGAGCATCC  
AAAGGGAACAAGACTTGCAGGCTTTGTGGATGAAAGAGGCCCTGTATAAGTCTCTAAAAGGAGCATGCAGGCTC  
AAGTTATGTGGAGTTCTTGGACTTAGACTTATGGATGGAACATGGGTGCGGATGCAAACATCAGATGAGACC  
AAATGGTGCCCTCCAGATCAGTTGGTGAATTTGCACGACTTTCACTCAGACGAGATTGAGCATCTCGTTGTGG  
AGGAGTTAGTCAAGAAAAGAGAGGAATGTCTGGATGCATTAGAGTCCATCATGACCACCAAGTCAGTAAGTT  
TCAGACGTCTCAGTCACTGAGAAACTTGTCCCAGGGTTTGGAAAAGCATATACCATATTCAACAAAACCTT  
GATGGAGGCTGATGCTCACTACAAGTCAGTCCGGACCTGGAATGAGATCATCCCCTCAAAGGGTGTGTTGAA  
AGTTGGAGGAAGGTGCCATCCTCATGTGAACGGGGTGTGTTTCAATGGTATAATATTAGGGCCTGACGGCCAT  
GTCCTAATCCAGAGACGCAAGCATCCCTCCTCCAGCAACATATGGAGTTGTTGAAATCTTCAGTTATCCCCCT  
GATGCACCCCTGGCAGACCCTTCTACAGTTTTCAAAGAAGGTGATGAGGCTGAGGATTTTGTGAAAGTTCAC  
CTCCCCGATGTGTACAAACGGATCTCAGGGGTTGACCTGGGTCTCCCGAACTGGGGAAAGTATGTATTGATGA  
CTGCAGGGGCCATGATTGGCCTGGTGTGATTTTTCCCTAATGACATGGTGCAGAAGAGCCAATCGACCAGA  
ATCGAAACAACGCAGTTTTGGAGGGACAGGGAGGAATGTGTCAGTCACTTCCCAAAGCGGAAAAGTCATACC  
TTCATGGGAATCATATAAGAGTGGAGGTGAGATCAGACTGTGA

>RABV\_*Desmodus rotandus* strain\_Complete glycoprotein cds\_P#7

ATGATCCTCAGGCCCTTCTGTTTGTGCCTCTCCTAATCTCTTCGTTGTGTCTCGGGAAATTCCCATCTACACA  
ATACCGGACAAGCTCGGTCTTGGAGCCCCATCGATATACATCACCTCAGCTGTCCAAATAATTTAGTTGTGGA  
GGACGAGGGTTGCACCAATCTATCAGGGTTCTTTACATGGAAGTAAAGGTGGGATACATCTCTGCCATAAAG  
GTGAACGGGTTCACTTGTACCGGTGTTGTGACAGAGGCTGAAACCTATACCAACTTTGTTGGTTATGTCACCA  
CTACATTCAAGAGGAAACATTTCCGCCCTATACCGGATGCATGCAGGGCTGCATACAAGTGAAGATGGCTG  
GTGATCCTAGATATGAGGAGTCTCTACAAAATCCTTATCCTGATTACCACTGGCTACGGACTGTAAAGACCACT  
AAGGAGTCTCTTATCATCATATCCCCGAGTGTGGCTGATTTAGACCATAACAACAAATCCCTTCACTTAGGGT  
GTTCCCTGGTGGGAAGTGTGTTGGGAATAACGGTCTTCCACCTACTGCTCAACCAACCATGATTACACCATAT  
GGATGCCCGAGGAACCAAGACTCGGGACATCTTGCAGATTTTTACCAGCAGCAAGGGGAAAAAGGCATCTA  
AGGGAGGCAAGACTTGTGGATTTGTGGATGAAAGGGGCTGTACAAGTCTCTAAAAGGAGCATGTAAACTCA  
AGCTGTGCGGAGTTCTCGGACTTAGACTTATGGATGGAACCTGGGTCTCAATTCAAACATCAGACGATACCAA  
ATGGTGCCCTCCGATCAATTGGTGAATCTACATGATTTCACTCAGACGAAATAGAGCATCTCGTCGTGGAG  
GAGTTGGTCAAGAAGAGGGAAGAGTGTGTTGGACGCATTGGAGTCCATCATGACCACCAAAATCTGTAAGTTTT  
AGACGTCTCAGCTATTTGAGAAAACCTTGTCCCTGGGTTTGGAAAGGCATACACTATATTCAACAAGACTTTGAT  
GGAGGCTGACGCCACTACAAGTCAGTTCCGACTTGGAAACGAGATCATCCCCTCAAAGGGTGTGTTGAAAGT  
CAGAGAGAGGTGTCATCCTCCTGTGGACGGAGTGTCTTCAATGGCATAATTCTGGGTCCGGACGGGAATGT



CCTGATACCAGAGATGCAATCGTCTCTACTTCAACAACATATGGAGCTGTTGGAGTCTTCTGTAATCCCCTTAA  
TGCATCCCTTGGCGGACCCGTCAACAGTCTTCAAGGAAGGGGATGAAGCGGAGGATTTTGTGAAGTTCACCT  
CCCAGATGTTCAAAACAGATCTCAGGGGTTGACCTTGGTCTCCCGAGTTGGGGGAAATATCTCCTGATGATT  
GCAGGTGGTCTGGCGACACTAGTTCTGATAATCTGCTCGATGGCATGCTGTAGAAGAACCAAGCGAACAGAG  
TCGAGAAGGCGAGGCTCTGTAGAGTCAGGGAAAAAGGTAACGGCAACCCCCAGACTAGGAAAGTCGTATC  
TTCATGGGAGTTGTACAAGAGTGAAGGCGATGCCAGGCTGTGA

>RABV\_*Eptesicus fuscus* strain\_2401\_Complete glycoprotein cds\_P#12

ATGATCCCTCAGGCTCTTCTGTATGTGCCTCTCCTGATCTCCTCGTTGTGTTTCGGGGGATTCCCCATCTACACG  
ATACCAGACAAGCTCGGCCCTGGAGTCCCATTGACATACATCATCTCAGCTGTCCCAACAATTTGGTTGTGGA  
GGACGAGGGGTGCACCAGTCTGTCAGGGTTTTCTTACATGGAAGTGAAGTGGGGTACATCTCTGCCATAAA  
GGTGAATGGGTTCACTTGTACTGGTGTCTGACAGAAGCCGAGACCTACACCAACTTTGTtGGTTATGTCACC  
ACTACATTCAAGAGAAAACACTTTCCGCCcTATGCCAGACGCATGCAGAGCTGCATACAATTGGAAGATGGCCG  
GTGATCCTAGATATGAAGAATCTCTTCAAATCCTTATCCTGACTACAGTTGGCTACGGACCGTAAAGACCACC  
AAAGAGTCTCTTATTATCATATCTCCAAGTGTAGCGGATTTGGACCCATACGACAAAtcCctCATTCAAGAGTT  
TCCCTGGTGGGAAGTGTGGGAATAACAATCTCTTCTACCTACTGCTCAACTAACCATGATTACACCATCTG  
GATGCCTGAAGAAGCAAGACTCGGGACTTCTTGTGACATTTTTACCAACAGCAGAGGGAAAGAGAGCATCCAA  
GGGGGGCAAGACCTGCGGATTCGTGGACgAAAGGGGCTTGTACAAGTCTCTAAAAGGAGCATGTAAACTTAA  
GCTGTGCGGAGTTCCCGGACTCAGACTTATGGATGGAACCTGGGTCACAATTCAGACATCAaATGAAACCAAA  
TGGTGCCTTCTGATCAATTGGTAAATCTACATGACTTTCACTCAGATGAGATAGAACATCTTGTCTGAGGGA  
GTTGGTCAAGAAGAGGGAAGAATGTCTGGATGCACTGGAGTCCATCATGACCACCAATCCGTAAGCTTCAG  
ACGTCTTAGCCACTTGAGAAAACCTGTTCCCTGGGTTTGGAAAGGCATATACTATATTCAACAAGACCTTAATGG  
AAGCTGAtGCTCATTACAAGTCAATTCGGACCTGGAACGAAATCATCCCCTCAAAaGGGTGCCTAAAAGTCGG  
AGGGAGGTGTCaTCTCATGTGGACGGAGTGTCTTCAATGGTATAATTCTGGGTCCGGACGGGAATGTCCTG  
ATCCCTGAGATGCAATCGTCCCTACTTCAACAACATGTGGAGCTGTTGGAGTCTCTGTAATCCCTCTAATGCA  
TCCCTTGGCAGACCCATCAACAGTCTTTAAGGACGGTgATGAAGCGGAGGACTTTGTTGAGGTTACCTTCCG  
GATATTCACAAACAGGTCTCAGGGGTCGACCTTGGTCTCCCAAACCTGGGGGAAGTATCTGCTAATGAGTGCA  
GGTGCTCTGGCAACACTAATGCTGATAATCTTCTTAATGGCATGTTGCAGAAGAGCTAATCGAACAGAATCAA  
TACAACGAGATCCCGGGGAGTCAGGAAGGAAAGTATCGATACCTTCCAAGACGGGAAAGTCATATCTTCAT  
GGGAGTTGTACAAGAGTGGAGGCGAGACCAGGCTGTGA

>RABV\_*Tadarida brasiliensis* strain\_FL385\_Complete glycoprotein cds\_P#8

ATGATCTTTCAGGCTCTTCTATTTGTGCCTCTCCTAATTTCTTCGTTGTGTCTTGGGAAATCCCCATCTACACGA  
TACCAGACAAGCTCGTCTTGGAGCCCCATCGACATACATCACCTCCGCTGTCCAAACAATTTGGTTGTGGA  
GGACGAGGGGTGCACCAGCCTGTCAGGGTTTTCTTACATGGAAGTAAAGTGGGATACATCTCTGCCATAAA  
GATGAACGGGTTACCTGTACCGGTGTTGTGACAGAAGCTGAGACCTATACTAACTTTGTTGGTTATGTCACC  
ACCACATTCAAGAGGAAACATTTTCGCCCTATACCAGATGCATGTAGGGCTGCATACAACCTGGAAGATAGCTG  
GTGATCCCAGATACGAGGAGTCTCTTCAAATCCTTATCCTGATTATCATTGGCTACGGACAGTGAAGACCACC  
AAGGAGTCTCTTATCATCATATCTCCAAGTGTGGCTGATTTGGACCCATATGACAAATCCCTTCATTCTAGGTT  
GTTCCCTGGTGGGAAGTGTGGGAATAACAATTTCTTCTACCTACTGCTCCACCAACCATGATTACACTATCT  
GGATGCCTGAAGAACCAAGACTCGGGACATCTTGTGACATTTTTACTAATAGCAAAGGGAAAAAGGCATCTA  
AGGGGGGCAAGGTTTTCGGATTTGTGGATGAAAGGGGCTTGTATAAGTCTCTAAAGGGAGCATGTAAACTCA  
AGCTGTGCGGAGTTTCCGGACTTAGACTTATGGATGGAACCTGGGTTACAATTAGACGTCAGATGAGACCAA  
ATGGTGCCCTCCAGATCAATTGGTAAATCTACATGACTTTCACTCAGATGAAATAGAGCATCTCGTCTGGAG  
GAATTGGTTAAGAAGAGGGAGGAGTGTGGATGCATTAGAGTCCATCATGACCACCAATCTGTAAGTTTCA

GACGTCTAAGCTATTTGAGAAAACCTGTCCCCGGGTTTGAAAGGCATATACTATATTCAACAAGACTTTGAT  
GGAAGCTGACGCCACTACAAGTCAGTTTCGGACTTGGAATGAGATCATCCCCTCAAAGGATGTTTGAAAGTC  
AGTGATAGGTGTCATCCTCATGTAGACGGAGTGTCTTCAATGGCATAATTCTGGGTCCTGACGGGAATGTCT  
TGATACCTGAAATGCAATCGTCCCTACTTCAACAACATATGGAGCTGTTGGAGTCCTCTGTAATCCCCTTGATG  
CATCCCTTGGCAGACCCATCAACAGTATTCAAGGATGGAGACGAAGCGGAGGACTTTGTTGAAGTTCACCTCC  
CGGATGTTCACAAACAGATCTCAGGGGTTGACCTCGGTCTCCCTAGTTGGGGGAAGTATCTCCTCATGATTGC  
AGGTGGTCTAGCGACTAGTTCTGATAATCTTCTGATGGCATGTTGTAGAAGAACCAAGAGAACAGAATCA  
AGACGGCGAGGCTCTGGGGAATCAGGAGAGAAGGTATTGGCAACTCCCCAACCAAGAAAGTCGTATCTTCA  
TGGGAGTTGTACAAGAGAGAAGGCGATGCCAGGCTGTGA

>RABV\_canid variant\_38/20\_Complete glycoprotein cds\_P#11

ATGGTTCCTCAGGCTCTTTTGTGTTTTACCCCTTTTGGTTTTTCCATTGTGTTTCGGGAGATTCCCTATCTACACGA  
TACCAGACAACTTGGACCTGGAGCCCAATTGACATACATCATCTCAGCTGCCCAAACAATTTGGTTGTGGA  
GGACGAAGGATGCACCAACCTGTCAGGGTTCCTACATGGAACCTCAAAGTTGGATACATCTCAGCCATAAAG  
GTGAACGGATTCACTTGCACAGGCGTTGTGACTGAGGCTGAAACCTACACTAACTTTGTAGGTTATGTCACCA  
CCACGTTCAAAGAAAGCATTTCGCCCAATACCAGACGCATGTAGAGCCGCATACAACCTGGAAGATGGCCG  
GTGACCCCAGATATGAAGAGTCTCTACACAATCCGTACCCTGACTACCACTGGCTTCGAACTGTAAAAACCACC  
AAGGAGTCTCTCGTTATAATATCCCCAAGTGTGGCGGATTTGGACCCATATAACAAATCCCTTCACTCGAGGGT  
CTTCCCCAGCGGGAAGTGCTCAGGAATAACGGTGTCTTCTACCTTCTGCTCAACTAACCCAGATTACACCATTT  
GGATGCCTGAAAATCCGAGACTGGGGACGTCTTGTGACATTTTCGCCAATAGTAGAGGGAAGAGAGCATCTA  
AAGGGGGTAAGACCTGCGGCTTTGTAGACGAAAGAGGCCTGTATAAATCTCTAAAGGGAGCATGCAAACCTCA  
AGTTATGTGGAGTTCTCGACTTAGACTCATGGATGGAACATGGGTGCGGATGCAAACATCAGATGAGACCA  
AATGGTGTCCCCCTGACCAGTTGGTAAATATACACGACTTTCGCTCGGATGAAATTGAGCATCTTGTGTGGA  
GGAGTTAGTTAAGAAAAGAGAGGAGTGTCTGGATGCACTAGAGTCCATCATGACCACCAAGTCAGTGAGTTT  
CAGACGTCTCAGTCACTTGAGAAAACCTGTCCCTGGGTTTCGAAAAGCATAACCCATATCAACAAGACCTTG  
ATGGAGGCTGATGCTCACTACAAGTCGGTCCGGACTTGGAATGAGATCATCCCCTCAAAGGGTGTGTTAAGA  
GTTGGAGGGAGGTGTCATCCCCATGTGAACGGGGTGTCTTCAATGGTATAATATTAGGGCCCGACGGCCAT  
GTTCTGATCCCCGAGATGCAATCATCCCTCCTCAGCAACATATGGAGTTATTGGAATCCTCAGTTATCCCCTG  
ATGCACCCTCTGGCAGACCCGTCCACAGTTTTCAAGGACGGTGATGAGGCTGAGGATTTTGTAGAGGTTACC  
TCCCTGATGTGCACAAACAGGTCTCGGGGTTGACCTAGGTCTCCGAACTGGGGGAAATATATATACTAG  
TGCAGGGACCCTGATTGCCTTGATGTTGATAATTTTTCTAATGACATGTTGTAGAAGAGTCAATCGACCAGAGT  
CTACTGAACGCAGTCTCGGAGGGACAGGGAGGAAGGTGTCGGTCACTTCCCAAAGCGGAAAGGTCATATCTT  
CATGGGAGTCATATAAAAGTGGGGGTGAGACTAGATTGTAA

>RABV\_mongoose variant\_114/20\_Complete glycoprotein cds\_P#12

ATGTCTTCTCAGTCTCTTTGTTTGTATCCCTTCTGGGTTTTTCACTGTGTTTCGGGAAGTTCCTCAATTTACACGA  
TACCAGATAAACTTGGTCCCTGGAGCCCGATTGATATACATCATCTCAGTTGTCCAAACAATTTGGTAGTGGAG  
GATGAAGGATGCACTAACCTATCGGGATTCTCCTACATGGAACCTAAAGTGGGATACATCTCAGCCATAAAAG  
TAAATGGGTTTACGTGTACAGGTGTGGTGACGGAGGCAGAAACCTATACAACTTTGTGCGTTATGTCACCAC  
CACGTTCAGAAGAAAGCATTTCGCCCTACACCGGATGCATGTAGATCCGCGTACAACCTGGAAGATGGCCGG  
TGACCCAGATATGAAGAGTCTCTGCACAATCCATACCCTGACTACCACTGGCTTCGCACCGTCAAACCACCA  
AGGAATCTCTCGTCATAATATCCCCTAGTGTGGCAGATTTGGACCCATATGACAACCTCCCTTCACTCGAGGGTC  
TTCCCCAACGGAAAGTGCTCAGGGCTAACTGTATCCTCTACCTATTGCTCGACCAACCATGACTACACTATCTG  
GATGCCTGAGAATCCAAGACTGGGGACATCTTGTGACATCTTTACCAATAGTAGAGGAAAGAGAGCATCCAG

AGGAAACAAGACCTGCGGATTCGTGGATGAGAGAGGCTTGTATAAGTCTCTAAAAGGAGCATGTAAACTCAA  
ATTGTGTGGTGTTCCTGGACTGAGGCTTATTGATGGAACATGGGTCGCGATGCACACATCGGATGAGACCAA  
ATGGTGCCCCCcGATCAGTTGGTAAATCTACATGACTCCGCTCAGACGAGATTGAACATCTCGTTGTGGAG  
GAGTTGGTCAAGAAAAGAGAGGAGTGTGGATGCATTAGAATCCATCATGACCACCAAGTCAGTGAGTTTC  
CGACGTCTCAGTCACTTGAGAAAACCTGTCCCCGGGTTTCGGAAAAGCATATACCATCTTCAACAAAACCTTGAT  
GGAGGCCGATGCTCACTACAAGTCAATCCGGACCTGGGATGAAATCGTCCCCTCGAAAGGATGTCTAAGGGT  
GGGAGGGAGATGTCATCCTCATGTAATGGGGTGTTCCTCAATGGCATAATACTGGGGTCTGACGGCCATGTT  
CTAATCCCCGAGATGCAATCATCCCTCCTTCAGCAACATGTAGAGTTGCTGGAATCCTCAGTTGTTCCCTTAAT  
GCACCTTTGGCAGACCCATCTACAGTCTTAAGGACGGAAATGAAGCTGAAGATTTTGTGAGGTTACCTC  
CCCGATGTACACAAGCAGGTCTCAGGGTGTGACTTGGGTCTCCAGACTGGGGAAGGTATATTCTGGTGAGT  
GCAGGAGCCCTGATTACCTGATTTTGATAATTTTCTAATAACATGTTGCAGAAGAGTCTATCGACGAGAATC  
CAAGCAACACAGTCTCAGAGGGACAGAGAGGAAGGTGTGGTCCATCTCAAAGCGGAAAAGCCATATCCTC  
ATGGGAGTCATATAAGAACGGGAGTGAACCAAGAATGTGA

>SHIBV\_RV3381\_Complete glycoprotein cds\_P#11

ATGAGCAATTTATGCACCATTTTCATCCTGTGTGCAAGTATAATGGTTTCTTTAGGTGATTTTCCACTGTACACA  
ATTCCCGAGAAAATAGGACCATGGACGCCATTGATTTGACCCATCTGAGTTGTCCAAACAACCTGCTTTCAGA  
AGATGACGGATGCAGCTCTTCTCAACTTTCACTTATATAGAATTGAGAACTGGTTATCTCACCCATCAAAAAG  
TGTCTGGATTTACGTGTAAGTGGAGTCATCAACGAAGCAGTTACATACACCAATTTTGTAGGATATGTAACAACC  
ACTTTTAAAAGAAAACATTTCAAACCAACTGCTTCTGCCTGTAGGGATGCATATCATTGGAAAATTTCTGGAGA  
TCCTCGTTATGAAGAATCACTACACACTCCTTACCCGGACAACAGTTGGTTGAGAACAGTCACTACAACCCAAA  
GAATCACTTCTAATCATCTCTCCAAGCATAGTGGAGATGGACATTTATAGTCGTTCTCTTCATTACCAATGTTT  
CCCACAGGGAGGTGTTATGACTTCTATAAATCTACCCCTTCTTGCTTGACCAACCATGACTATACAATATGGCTT  
CCTGATGATGCAAATGTACGACTCACATGCGATATCTTTGTAACGAGTACCGGAAAGAAATCAATGAATGGTT  
CAAAAATGTGTGGCTTACTGATGAAAGAGGACTTTATAGAATCTGAAAGGGGCTTGTAAGTTGACATTATG  
TGGAAAGCCAGGACTGAGATTGTTTCGATGGCACCTGGATTTCTATCACAAGACCTGAGATTGTTATGTGGTGT  
TCTCCTAATCAACTTGTGAATGTGCATAACAACAGAGTGGATGAGATAGAACAATTAATTGTGGGTGACTTGA  
TCCGTAGAAGAGAAGAGTGCCTGGATACCTTAGAGACAGTTCTTATGTCAAAGTCAGTTAGTTTTAGACGACT  
GAGTCATTTTCAGAAAGCTTGTCCCGGGTTTTGGAAAGGCATATACCATCGCCAATGGGAGCCTAATGGAAACC  
AATGTACACTACAAAAGAGTAGATCGTTGGGAGGAAATATTACCCTCAAAGGGTGCCTAAAACCTGAATGAC  
AAGTGTCTTAACCTGAGAATGGGGTGTTCCTTAATGGGATCATTAAAGGCCCTGATGGACAGGTTTTAATTC  
CAGAAATGCAGTCAAGTTTATTGAAGCAACATATGGACTTGCTGAAAGCTTCTGTATTTCTCTAAGACATCCT  
TtGATCGATCAaAcaTCTATCTTCAAAAAGATGGAGAGGCAGATGACTTTGTTGATGTTACATGCCAGATCC  
GcATAAGTCAATaTcCaATATAGATTTAGGTTTACCAGACTGGGGTCTATATGCAATGATTGGGGGAACTGTAG  
TTGCATTTCTAATATTGGTGTGTCTCCTCTGTACTTGTGAAAAGAAGACGAAGGAGGAATTCCAGAAAGCCT  
AGCTCAGAACAAACCCCAAAAATTTCTACTCCTCCTTCTGGGACTAAAGTCATATCATCTTGGGAGTCTTAT  
AAAGGCACATCTAGTGTGTAA

>WCBV\_RV3384\_Complete glycoprotein cds\_P#7

ATGGCTTCTACTTTGCGTTGGTCTTGAACGGGATCTCTATGGTTTTTCAGTCAAGGTCTTTTCCCCCTTACACT  
ATCCCTGACCATCTGGGACCATGGACCCCATAGATCTAAGTCACCTTCACTGCCGAACAATCTTTATACTGA  
TGCTCTTATTGTACAACCTGAACAAAGCATAACCTACACAGAGTTGAAGGTCGGATCATCTGTGTACAAAAA  
ATCCCCGGATTTACATGTACGGGGTAAGAAGTGAATCTGTAACATATACCAACTTTGTTGGCTATGTGACTAC  
CACGTTCAAGAAAAAACCTTCTCCTAAATCCAGGGACTGTAGAGAGGCGTATGAGAGGAAGAAAGCAGG

AGATCCTAGATATGAAGAGTCTTTAGCCCACCCATATCCTGACAACAGTTGGCTGAGAACAGTGACTACAACA  
AAGGATTCCTGGGTGATCATCGAGCCCAGTGTAGTGGAGTTAGATATATACACAAGTGCCTTGTATTCACCTC  
TTTTCAAGGATGGAACATGTTCAAAATCTAGAACATATCCCCCTACTGTCCAACCAATCATGACTTCACCATT  
GGATGCCAGAGAGTGAAAACATAAGATCTGCCTGTAATCTGTTTTCCACAAGTAGAGGGAAACTAGTCAGGA  
ACCGCACATCCACCTGCGGGATTATCGATGAGAGAGGGGCTGTTTCAGATCAGTTAAAGGAGCATGCAAAATAT  
CAATATGCGGTAGGCAGGGAATCCGTTTAGTGGATGGAACCTGGATGTCTTTAGATACTCAGAGTACTTACC  
TGTGTGTTCTCCATCACAGCTGATCAACACGCACGACATCAAGGTCGATGAGCTGGAGAATGCTATAGTTTTA  
GACTTGATTAGGAGGAGAGAAGAATGTCTTGACACCCTAGAAACAATTTTGATGTCAGGATCTGTGAGTCACA  
GGAGGCTGAGTCATTTAGAAAAGCTGGTTCAGGATCTGGGAAGGCTTACTCTTATATAAACGGCACCTAAT  
GGAATCAGATGCTCACTACATCAAGGTAGAGAATTGGTCAGAGGTCATCCACACAAAGGATGTCTCATGGTC  
GGGGGCAAATGCTATGAGCCAGTCAATGATGTGTATTTCAACGGGATCATTGGGATTCAAATAATCAGATCT  
TGATACCTGAGATGCAGTCCAGTCTTCTCAGAGAACATGTTGACCTGTTGAAGGCTAATATAGTTCCGTTGAG  
GCATCCAATGTTACTTAGGTCCTTACATCTGACACTGAAGAAGATATCGTCGAGTTTGTCAACCCTCATCTCC  
AAGATACCCAGAAGTTGGTGTGAGATATGGATCTCGGGTATCAGACTGGAAGAGATATCTACTAATTGGATC  
TTTGGCCGTAGGAGGAGTGGTAGCAATCTTATTCATCGGAACATGTTGTCTGAGATGTAGAGCAGGGAGAAA  
CAGAAGAACAATCCGATCCAATCATAGGTCATTGTCCATGACGTGGTGTCCATAAAGATAAGGATAAAGTG  
ATTACTTCTGGGAATCTTACAAGGGACAAACTGCCAATAA
